# Supplementary material for: Three new Penicillium species isolated from the tidal flats of China
Source: PeerJ journal article supplement (doi:10.7717/peerj.13224), 2022-05-06

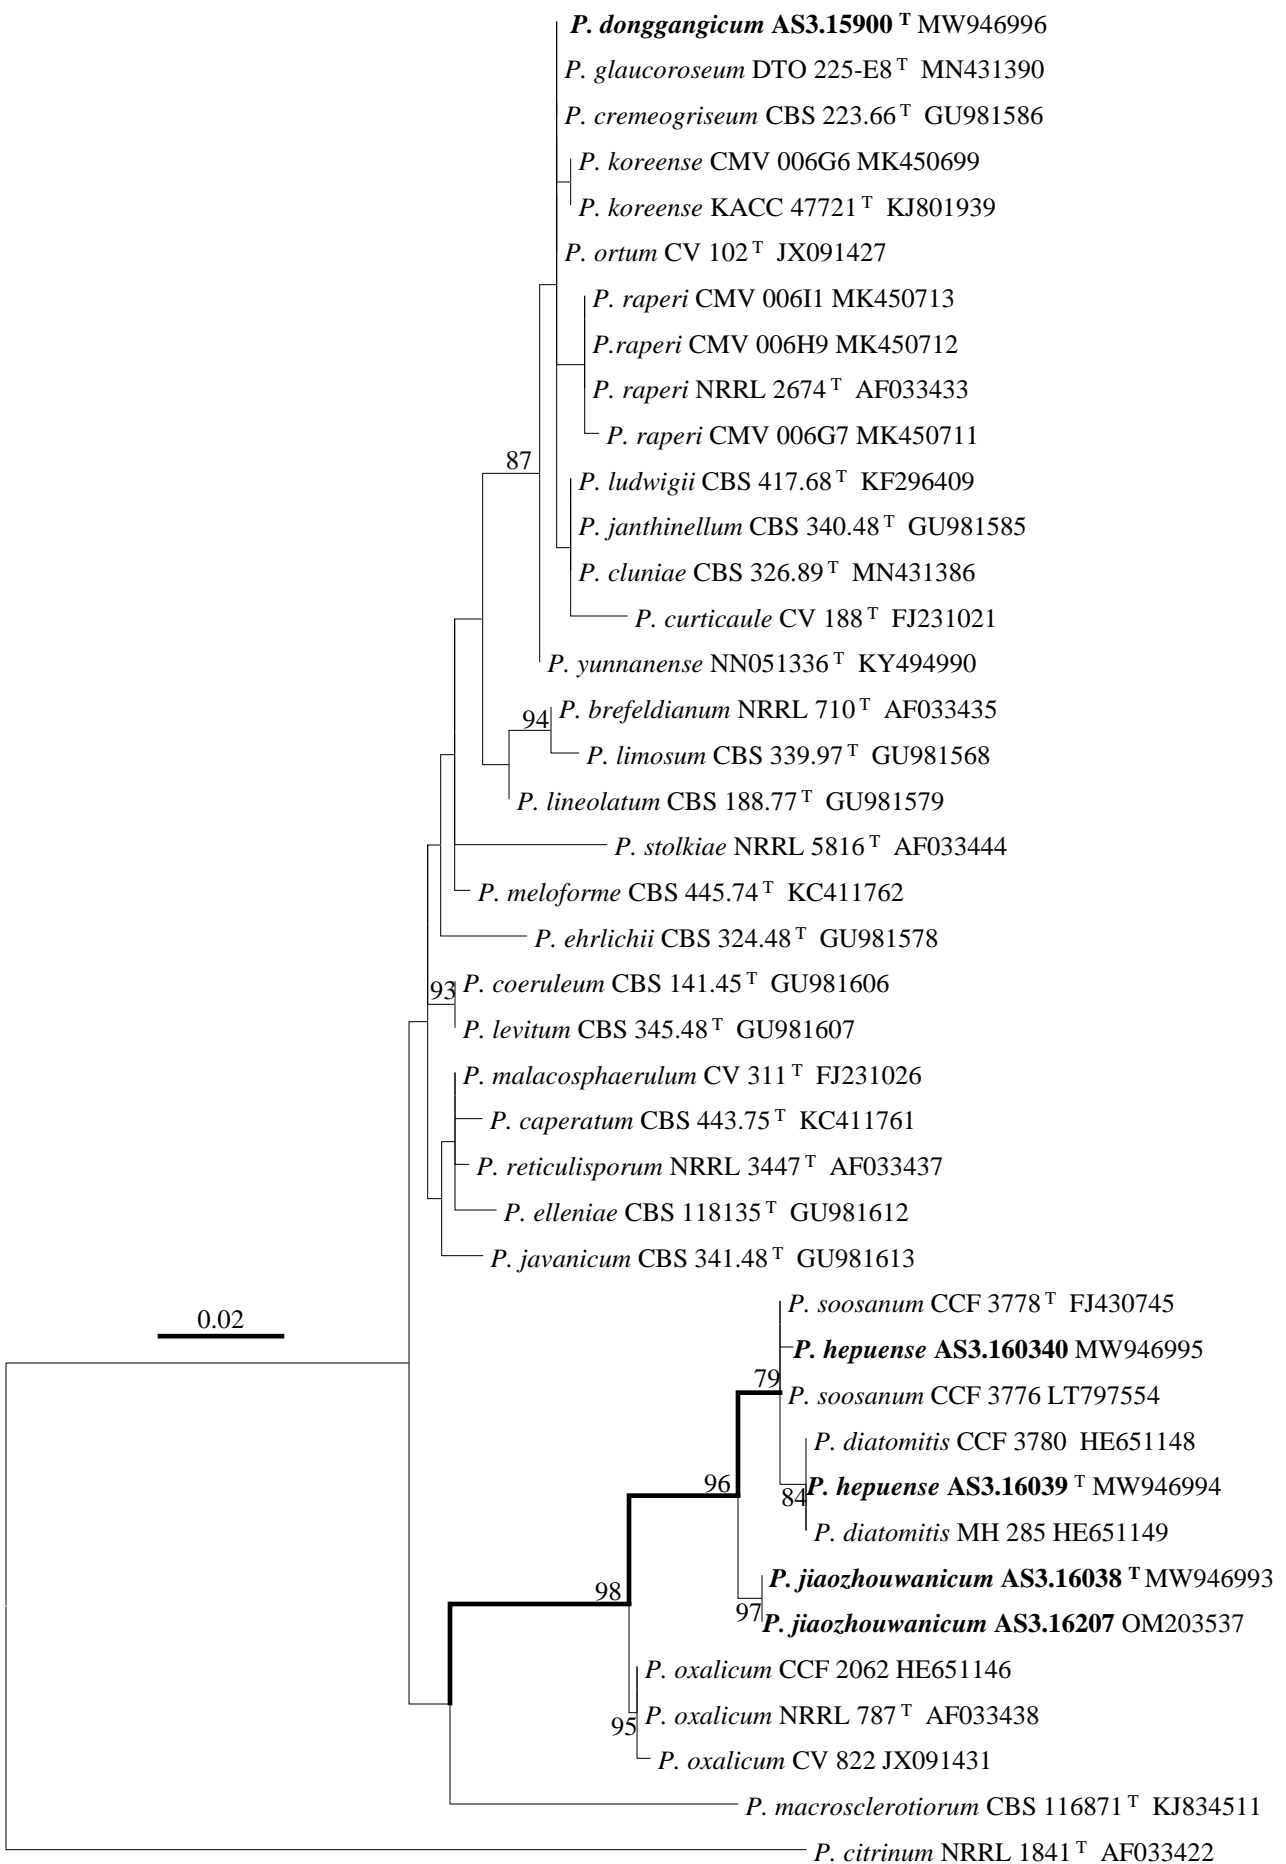

Supplement: fig_S1_its_r2.pdf [file fig_S1_its_r2.pdf]
